# Supplementary material for: Impact of Dietary Trajectories on Obesity and Dental Caries in Preschool Children: Findings from the Healthy Smiles Healthy Kids Study
Source: MDPI journal article supplement (doi:10.3390/nu13072240), 2021-06-29
Supplement: s1 [file s1]

## Supplementary Material

**Table S1.** List of dietary items ( $n = 32$ ) recorded in the short food frequency questionnaire.

| Dietary Items<br>(In the past 7 days how often (count data) was your baby/child fed each of the following foods and/or drinks?) | Interview Phases |              |            |             |             |
|---------------------------------------------------------------------------------------------------------------------------------|------------------|--------------|------------|-------------|-------------|
|                                                                                                                                 | 4-<br>months     | 8-<br>months | 1-<br>year | 2-<br>years | 3-<br>years |
| <b>Core (<math>n = 12</math>)</b>                                                                                               |                  |              |            |             |             |
| <i>Dairy</i>                                                                                                                    |                  |              |            |             |             |
| Cow milk                                                                                                                        |                  |              |            |             |             |
| Other milk: soy milk, goat milk, rice milk                                                                                      |                  |              |            |             |             |
| Plain Yoghurt                                                                                                                   |                  |              |            |             |             |
| Cheese                                                                                                                          |                  |              |            |             |             |
| <i>Grains</i>                                                                                                                   |                  |              |            |             |             |
| Baby cereal                                                                                                                     |                  |              |            |             |             |
| Cereals                                                                                                                         |                  |              |            |             |             |
| Other starches (e.g., breakfast cereals, bread, rice, pasta, crackers)                                                          |                  |              |            |             |             |
| <i>Fruits</i>                                                                                                                   |                  |              |            |             |             |
| <i>Vegetables</i>                                                                                                               |                  |              |            |             |             |
| <i>Meat and alternatives</i>                                                                                                    |                  |              |            |             |             |
| Meat, chicken, combination dinners                                                                                              |                  |              |            |             |             |
| Fish or shellfish                                                                                                               |                  |              |            |             |             |
| Eggs                                                                                                                            |                  |              |            |             |             |
| <b>Discretionary (<math>n = 20</math>)</b>                                                                                      |                  |              |            |             |             |
| <i>Foods with added sugars</i>                                                                                                  |                  |              |            |             |             |
| Flavored milk (e.g., Milo™, Nesquik™, Chocolate milk)                                                                           |                  |              |            |             |             |
| Flavored yogurt                                                                                                                 |                  |              |            |             |             |
| Ice cream, custard and other dairy desserts                                                                                     |                  |              |            |             |             |
| Fruit Juice (if diluted, state the %)                                                                                           |                  |              |            |             |             |
| Soft drinks (e.g., Coke™)                                                                                                       |                  |              |            |             |             |
| Cordial including Ribena™                                                                                                       |                  |              |            |             |             |
| Sports drinks (e.g., PowerAde™ and Gotarade™)                                                                                   |                  |              |            |             |             |
| Powdered drink (e.g., Tang™)                                                                                                    |                  |              |            |             |             |
| Flavored mineral water                                                                                                          |                  |              |            |             |             |
| Iced Tea                                                                                                                        |                  |              |            |             |             |
| Iced Coffee                                                                                                                     |                  |              |            |             |             |
| Hot Tea (if sugar added)                                                                                                        | X                | X            | X          |             |             |
| Hot Coffee (if sugar added)                                                                                                     | X                | X            | X          |             |             |
| Lollies (candy), chocolate and sugar-based confectionary                                                                        |                  |              |            |             |             |
| Syrups, jams and sweet spreads (e.g., Nutella, honey and maple syrup)                                                           |                  |              |            |             |             |
| Honey                                                                                                                           |                  |              |            | X           | X           |
| Packaged sweet snacks e.g., muesli bars/fruit straps                                                                            | X                | X            | X          |             |             |
| Biscuits, cakes and/or puddings                                                                                                 |                  |              |            |             |             |
| <i>Foods with added fats and/or salt</i>                                                                                        |                  |              |            |             |             |
| French fries/ hot chips                                                                                                         |                  |              |            |             |             |
| Packed snacks such as Potato chips/crisps                                                                                       | X                | X            | X          |             |             |

X: Frequency of intake NOT recorded at that specific interview phase.
